# Supplementary material for: Unsaturated iron ion-based coordination polymer for highly efficient photocatalytic hydrogen evolution with simultaneous real wastewater degradation: mechanistic insight into multifunctional Fe–N sites
Source: Royal Society of Chemistry journal article supplement (doi:10.1039/d1ta06555f), 2021-01-01
Supplement: d1ta06555f1.pdf [file d1ta06555f1.pdf]

## Electronic Supplementary Information

### **Unsaturated iron ion based coordination polymer for highly efficient photocatalytic hydrogen evolution with simultaneous real wastewater degradation: Mechanistic insight into multifunctional Fe-N sites**

Qiuchen Wang<sup>#,a</sup>, Jun Ma<sup>#,a</sup>, Gen Li<sup>a</sup>, Tianxiang Zhao<sup>a</sup>, Peng Chen<sup>\*,a</sup>, Fei Liu<sup>\*,a</sup>,  
Shuang-Feng Yin<sup>\*,b</sup>

<sup>a</sup> Provincial Guizhou Key Laboratory of Green Chemical and Clean Energy Technology, School of Chemistry and Chemical Engineering, Guizhou University, Guiyang 550025, Guizhou, China

<sup>b</sup> State Key Laboratory of Chemo/Biosensing and Chemometrics, Provincial Hunan Key Laboratory for Cost-effective Utilization of Fossil Fuel Aimed at Reducing Carbon-dioxide Emissions, College of Chemistry and Chemical Engineering, Hunan University, Changsha 410082, Hunan, China

E-mail: pchen3@gzu.edu.cn (P. Chen), jma3@gzu.edu.cn (J. Ma),  
ce.feiliu@gzu.edu.cn (F. Liu), sf\_yin@hnu.edu.cn (S. F. Yin)

These authors contribute equally to this work.

**Table S1.** The components of organic wastewater before and after reaction from brewing liquor (the information obtained by HPLC-MS (Shiyanjia Lab ([www.shiyanjia.com](http://www.shiyanjia.com)))).

| Entry | Organics (before)                   | Quantitative % | Organics (after)                                        | Quantitative % |
|-------|-------------------------------------|----------------|---------------------------------------------------------|----------------|
| 1     | 2-Butanone                          | 10.89          | 2-Butanone                                              | 6.36           |
| 2     | Ethanol                             | 3.53           | Ethanol                                                 | 1.21           |
| 3     | 2-Butanol, (R)-                     | 22.2           | 2-Butanol                                               | 8.02           |
| 4     | Acetic acid                         | 11.26          | Acetic acid                                             | 7.44           |
| 5     | Propanoic acid                      | 4.29           | Propanoic acid                                          | 3.66           |
| 6     | Butanoic acid                       | 7.62           | Butanoic acid                                           | 5.08           |
| 7     | 2-Furanmethanol                     | 1.91           | 2-Furanmethanol                                         | 0.92           |
| 8     | Pentanoic acid                      | 1.12           | Pentanoic acid                                          | 1.06           |
| 9     | Hexanoic acid                       | 1.98           | Hexanoic acid                                           | 1.79           |
| 10    |                                     |                |                                                         |                |
| 11    | Phenylethyl Alcohol                 | 5.75           | Phenylethyl Alcohol                                     | 3.85           |
|       | Phenol, 2,4-bis(1,1-dimethylethyl)- | 5.93           | Phenol, 2,4-bis(1,1-dimethylethyl)-                     | 5.65           |
| 12    |                                     |                |                                                         |                |
|       | Butanoic acid, 3-methyl-            | 3.81           | Benzoic acid                                            | 0.14           |
| 13    |                                     |                |                                                         |                |
|       | n-Hexadecanoic acid                 | 1.15           | Hydrocinnamic acid                                      | 0.14           |
| 14    |                                     |                |                                                         |                |
|       | (R)-(-)-2-Amino-1-propanol          | 2.45           | Octanoic acid                                           | 0.627          |
| 15    |                                     |                | Cyclohexane, 1-ethenyl-3-methylene-5-(1-propenylidene)- | 0.36           |
|       | Octadecanoic acid                   | 0.37           |                                                         |                |

|    |                                                                       |       |                         |      |
|----|-----------------------------------------------------------------------|-------|-------------------------|------|
| 16 | Squalene                                                              | 0.29  | Benzaldehyde, 3-methyl- | 0.04 |
| 17 | Propane, 1-chloro-2-methyl-                                           | 0.81  | Formamide               | 0.23 |
| 18 | Butyric acid, 2-tridecyl ester                                        | 0.07  | 1-Hexanol, 2-ethyl-     | 0.04 |
| 19 | 2-Chloropropionic acid, decyl ester                                   | 0.02  | Propane, 1-nitro-       | 0.17 |
| 21 | 1-Aminocyclopentane hydroxamic acid                                   | 0.03  | Urea                    | 0.05 |
| 22 | 3-Cyclohexene-1-carboxylic acid                                       | 0.08  | 1-Propanol              | 0.11 |
| 23 | Borazine, 1,3-dimethyl-                                               | 0.04  | aliphatic hydrocarbons  | 5.13 |
| 24 | Benzothiophene, 5-chloro-3-methyl-2-(2-phenyl-4-thiazolyl)-           | 0.04  | aromatic compounds      | 3.07 |
| 25 | Pyrazine, trimethyl-                                                  | 0.05  |                         |      |
| 26 | Sulfurous acid, pentyl tridecyl ester                                 | 0.26  |                         |      |
| 27 | Phenol, 2,2'-methylenebis[6-(1,1-dimethylethyl)-4-methyl-             | 0.43  |                         |      |
| 28 | Dodecane, 2,6,11-trimethyl-                                           | 0.15  |                         |      |
| 29 | 5H-Thiazolo[3,2-a]pyrimidine-6-carboxylic acid, 5-imino-, ethyl ester | 0.01  |                         |      |
| 30 | 4-Hexenoic acid, 2-acetyl-2-methyl-, ethyl ester, (E)-                | 0.02  |                         |      |
| 31 | Pentadecane, 8-hexyl-                                                 | 0.28  |                         |      |
| 32 | Hexadecane, 2,6,11,15-tetramethyl-                                    | 0.09  |                         |      |
| 33 | Tributyl acetylcitrate                                                | 0.03  |                         |      |
| 34 | aliphatic hydrocarbons                                                | 12.31 |                         |      |
| 35 | aromatic compounds                                                    | 6.25  |                         |      |

---

**Table S2.** Estimation of Fe, C, N and S contents of as-fabricated samples by XPS.

| Samples | Fe   | C    | N    | S    |
|---------|------|------|------|------|
| TMT     | -    | 47.2 | 25.4 | 27.4 |
| FeS     | 43.4 | 55.6 | -    | -    |
| FeTMT   | 10.6 | 51.0 | 19.5 | 20.9 |

**Table S3.** AQY of H<sub>2</sub> evolution and COD value over FeTMT.

| Wavelength (nm)                        | 400   | 420   | 450   | 500    | 550   | 600   |
|----------------------------------------|-------|-------|-------|--------|-------|-------|
| H <sub>2</sub> evolution rate (μmol/h) | 11.78 | 15.92 | 4.95  | 2.63   | 1.01  | 0.85  |
| Light intensity (mW/cm <sup>2</sup> )  | 9.7   | 13.3  | 14.6  | 16.2   | 12.2  | 16.6  |
| Irradiation area (cm <sup>2</sup> )    | 9     | 9     | 9     | 9      | 9     | 9     |
| AQY (%)                                | 2.24  | 2.10  | 0.55  | 0.23   | 0.12  | 0.06  |
| COD (mg/L)                             | 193.5 | 220.9 | 283.7 | 286.14 | 308.5 | 329.8 |
| pH                                     | 4.73  | 5.01  | 4.57  | 4.52   | 3.96  | 3.95  |

**Table S4.** Comparison of different catalysts for photocatalytic HER.

| Entry | Catalyst                           | Targeted Pollutants | Reaction condition                                                                                 | H <sub>2</sub> generation rate (μmol g <sup>-1</sup> h <sup>-1</sup> ) |
|-------|------------------------------------|---------------------|----------------------------------------------------------------------------------------------------|------------------------------------------------------------------------|
| S1    | Pt/TiO <sub>2</sub>                | Formaldehyde        | 50 mg of the photocatalyst, 50 mL of an aqueous, UV illumination                                   | 1080                                                                   |
| S2    | Pt-Ti <sup>18</sup> O <sub>2</sub> | naphthalene         | 15 mg of the photocatalyst, 2.44 × 10 <sup>-4</sup> mol/L of naphthalene solution, λ = 320 ~380 nm | 900                                                                    |

|     |                                                                                        |                                                                             |                                                                                                  |        |
|-----|----------------------------------------------------------------------------------------|-----------------------------------------------------------------------------|--------------------------------------------------------------------------------------------------|--------|
| S3  | Carbon quantum dots/CdS quantum dots /g-C <sub>3</sub> N <sub>4</sub>                  | p-nitrophenol                                                               | 50 mg of the photocatalyst, 10 mg/L of organic pollutants solution, $\lambda > 420$ nm           | 9.4    |
| S4  | Cu <sub>2</sub> O/RGO /BiVO <sub>4</sub>                                               | tetracycline                                                                | 50 mg of the photocatalyst, 30 mL of tetracycline solution, $\lambda > 420$ nm                   | 5.9    |
| S5  | S-pCN/WO <sub>2.72</sub>                                                               | tetracycline                                                                | 100 mg of the photocatalyst, 100 mL of TC solution, $\lambda > 420$ nm                           | 786    |
| S6  | graphene quantum dots/Mn-N-TiO <sub>2</sub> /g-C <sub>3</sub> N <sub>4</sub>           | p-nitrophenol, diethyl phthalate and ciprofloxacin                          | 45 mg of photocatalyst, 80 mL of organic pollutant solution, 3 wt% Pt, $\lambda > 320$ nm        | 820    |
| S7  | C/X-TiO <sub>2</sub> @C <sub>3</sub> N <sub>4</sub>                                    | p-chlorophenol and rhodamine B                                              | 100 mg of the photocatalyst, 20 mg/L of organic pollutant solution, 3 wt% Pt, $\lambda > 420$ nm | 18.3   |
| S8  | Pt(2%)/C <sub>3</sub> N <sub>4</sub>                                                   | p-chlorophenol (PCP), p-nitrophenol (PNP), methylene blue (MB), rhodamine B | 100 mg of photocatalyst, 100 ml of 20 mg/L organic pollutant solution, $\lambda > 420$ nm        | 1.6    |
| S9  | 2D BP/2D C <sub>3</sub> N <sub>4</sub>                                                 | bisphenol A                                                                 | 20 mg of photocatalyst, 100 mL of 10 mg/L BPA solution, $\lambda > 400$ nm illumination          | 259.04 |
| S10 | Rh-doped SrTiO <sub>3</sub>                                                            | phenol                                                                      | 100 mg of photocatalysts, 2 mmol/L FeCl <sub>2</sub> solution, 300W xenon                        | 1.90   |
| S11 | Au NPs on sheaf-like TiO <sub>2</sub>                                                  | ibuprofen                                                                   | 50 mg of photocatalyst, 15 mg/L of ibuprofen solution, 300W xenon                                | 94.5   |
| S12 | ZnIn <sub>2</sub> S <sub>4</sub> /ZnTiO <sub>3</sub> /CaIn <sub>2</sub> S <sub>4</sub> | Acid Orange II                                                              | 50 mg of photocatalyst, 500 mL of Acid Orange II aqueous solution, 300W xenon                    | 59.6   |
| S13 | g-C <sub>3</sub> N <sub>4</sub>                                                        | tetracycline                                                                | 50 mg of photocatalyst, 5 mg/L of tetracycline solution, 2 wt% Pt, 300W xenon                    | 325    |

|           |                                                                        |                                     |                                                                                                           |      |
|-----------|------------------------------------------------------------------------|-------------------------------------|-----------------------------------------------------------------------------------------------------------|------|
| S14       | CuO/WO <sub>3</sub> /CdS                                               | methylene blue                      | 5 mg of photocatalyst, 100 mL of 10mg/L MB solution, 300W xenon                                           | 44.5 |
| S15       | Ag/g-C <sub>3</sub> N <sub>4</sub> -Ag-Ag <sub>3</sub> PO <sub>4</sub> | levofloxacin                        | 100 mg of the photocatalyst , 10mg/L of LEV aqueous solution, $\lambda > 400$ nm                          | 697  |
| This work | □FeTMT                                                                 | real wastewater from brewing liquor | 20 mg of the photocatalyst, 50 mL of real wastewater from brewing liquor, $\lambda > 420$ nm illumination | 1272 |

---

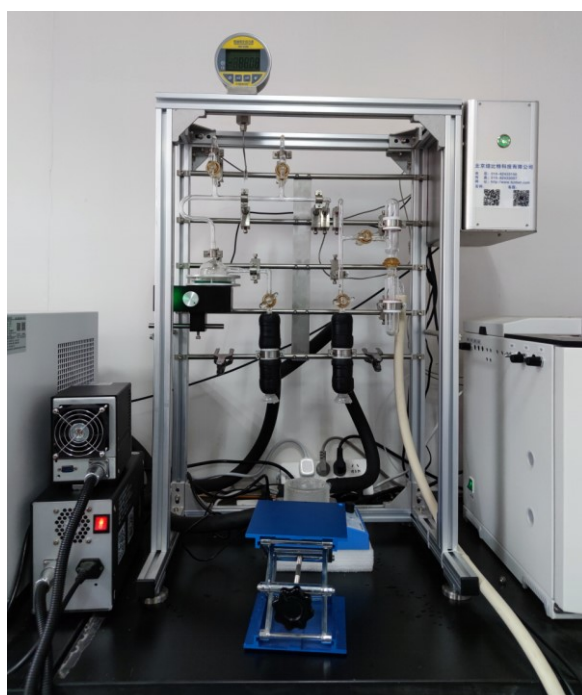

**Fig. S1.** Photograph of multi-channel photocatalytic reaction system.

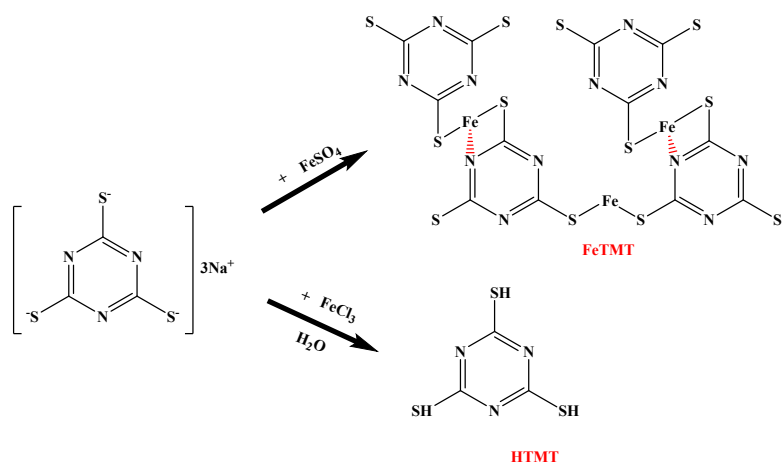

**Fig. S2.** Schematic of the preparation strategy for FeTMT

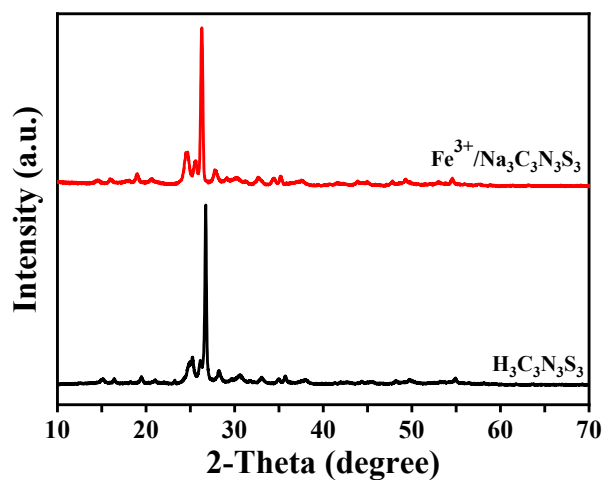

**Fig. S3.** XRD patterns of as-prepared sample by added  $\text{Fe}^{3+}$  into the  $\text{Na}_3\text{C}_3\text{N}_3\text{S}_3$  solution.

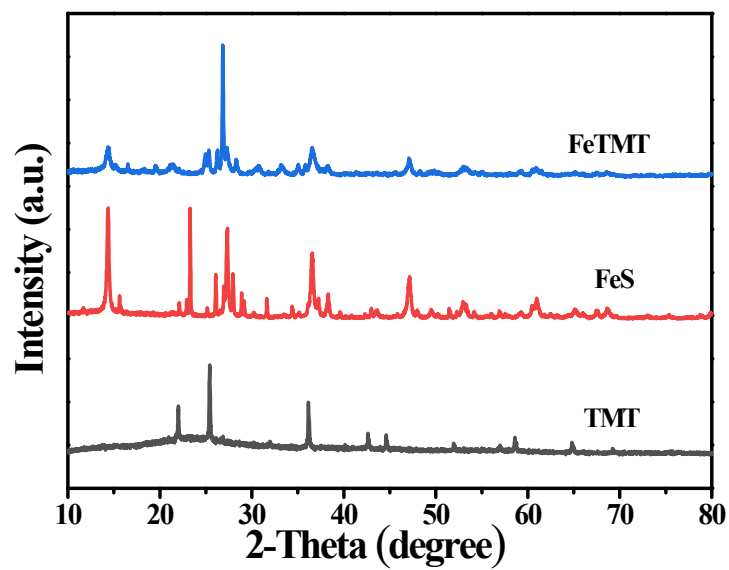

Fig. S4. XRD patterns of as-prepared samples.

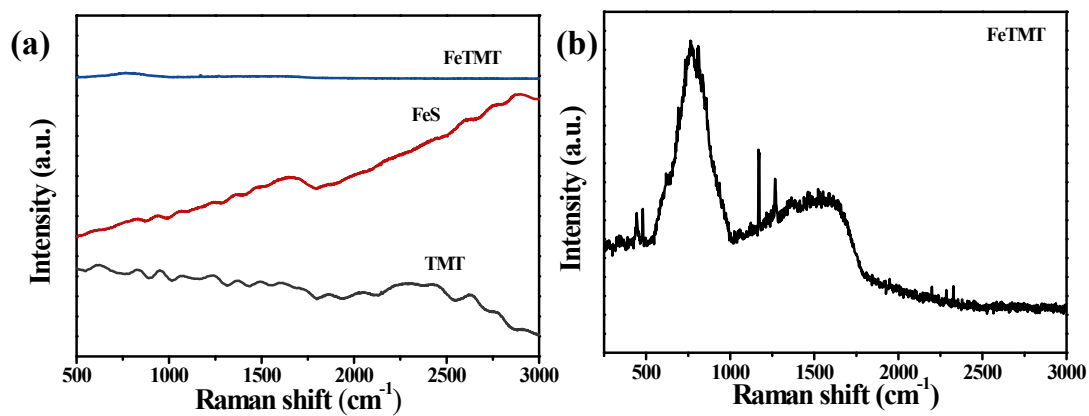

Fig. S5. Raman spectra of (a) as-prepared samples and (b) FeTMT.

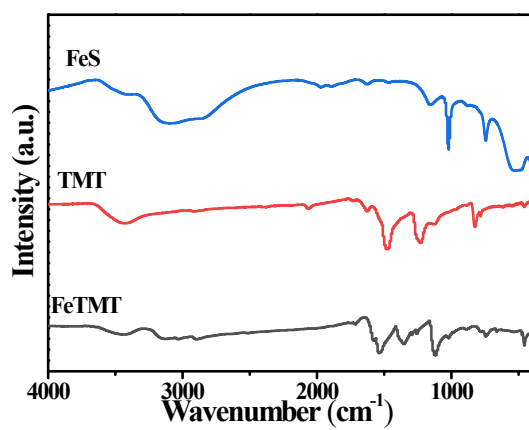



**Fig. S6.** FTIR spectrum of as-prepared samples.

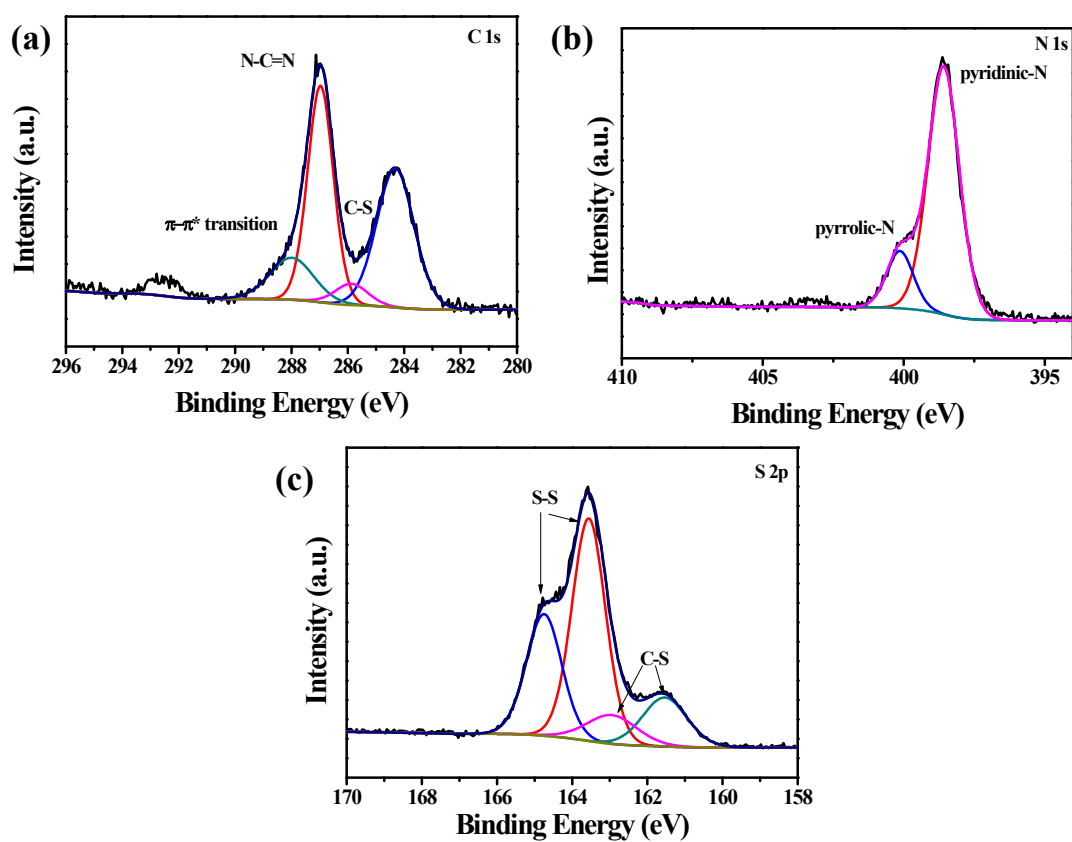

**Fig. S7.** XPS spectra of (a) C 1s (b) N 1s (c) S 2p and Fe 2p (B) over  $C_3N_3S_3$ .

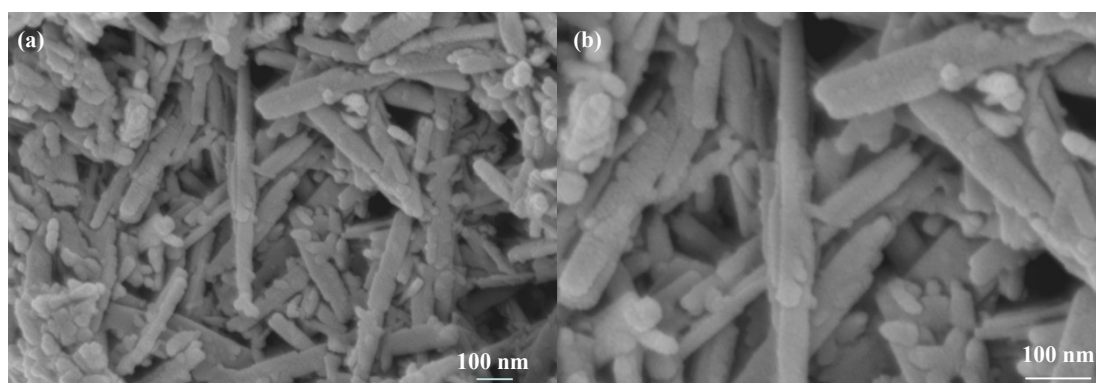

**Fig. S8.** (a-b) SEM images of FeTMT.

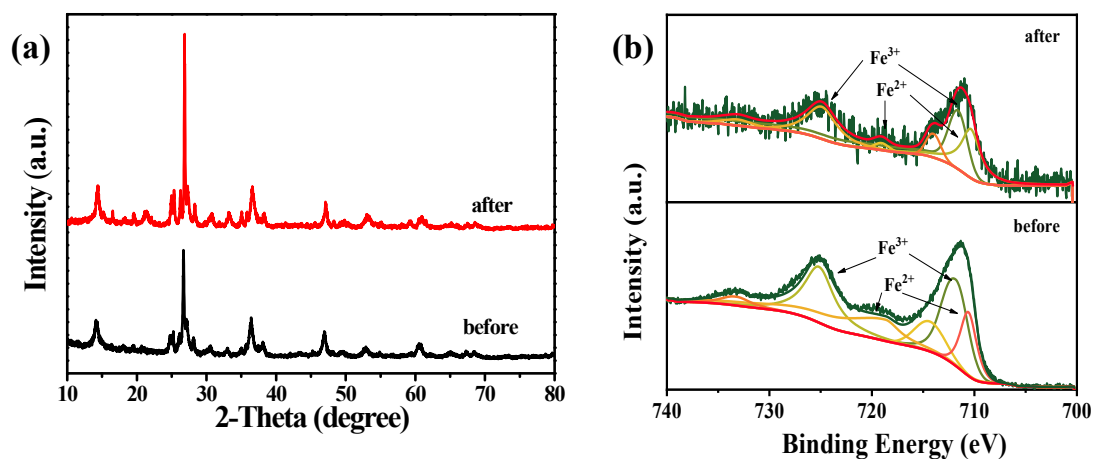

**Fig. S9.** XRD (a) and XPS (b) patterns of FeTMT before and after five cycles of reaction.

From the **Fig. S9a**, there is no apparent change of phase structure, evidencing high recyclability of the as-prepared photocatalyst. As shown in **Fig. S9b**, two main peaks around 710.4 and 718.9 eV represented the Fe (II) of 2p<sub>3/2</sub> and 2p<sub>1/2</sub>, respectively. The peak also observed at 712.0 and 724.7 eV could be assigned to Fe<sup>3+</sup> species, indicating the FeTMT still existed mixed valence of between +2 and +3. Besides, the molar ratio of Fe<sup>2+</sup>/ Fe<sup>3+</sup> before and after five cycles of reaction is 0.53 and 0.51 by XPS, respectively, suggesting no change has occurred in the valence states of Fe ions.

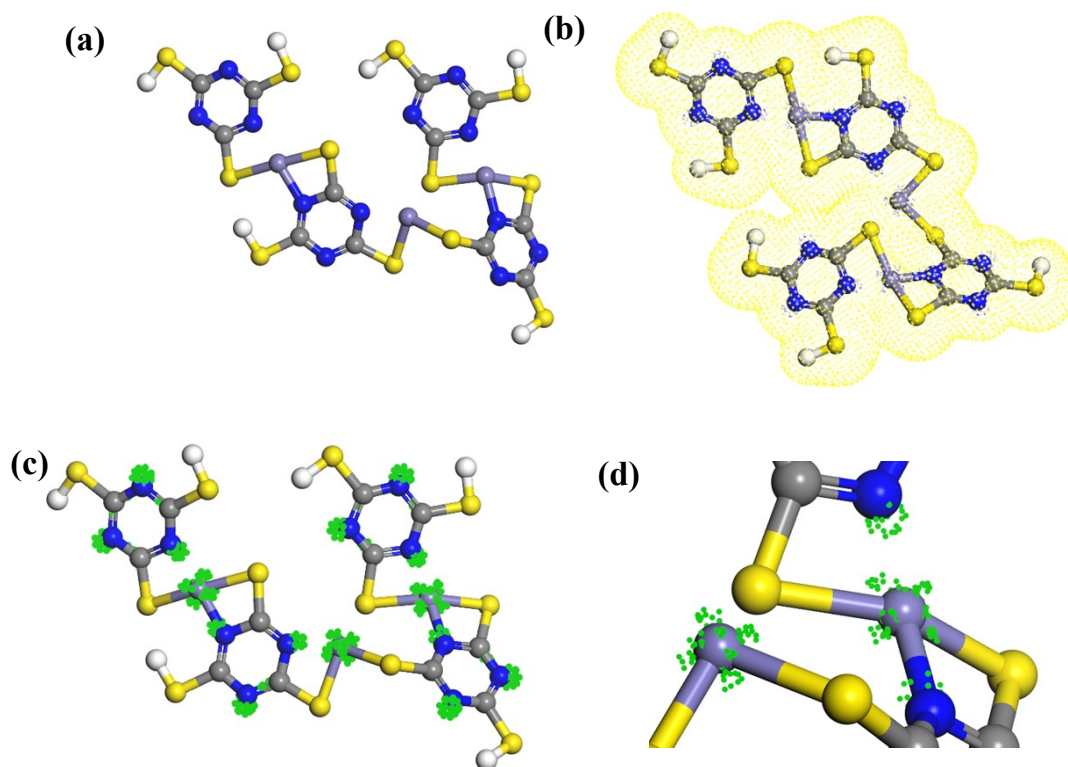

**Fig. S10.** (a) structure model and (b-d) electron density of FeTMT (S yellow, N blue, C grey, Fe dark grey, electron green).

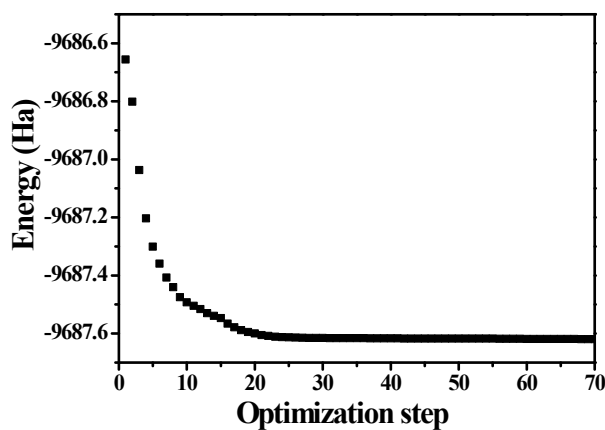

**Fig. S11.** Optimized structure and energy change curve by materials studio software.

The FeTMT was prepared by a facile wet-chemical method. The typical molecular structure of FeTMT was determined by instrumental characterizations and numerical optimization XPS, XRD and FTIR. The FeTMT structure of geometry optimization by materials studio software was shown in **Fig. S10a**. **Fig. S11** shows

the result of curve of energy changing with steps in geometry optimization. Obviously, the energy of the FeTMT structure tend to be stable in 70 steps. Under this equilibrium status, the structure reaches the lowest energy, which can be further applied to the following density function theory (DFT) calculation.

The Dmol3 module in the materials studio (MS) software was used to investigate the density of states (DOS), electron density (ED) and density field of FeTMT. Calculation accuracy was chosen ultra-fine. BLYP exchange correlation function in generalized gradient approximation (GGA) was selected. All electron nuclear treatment mode and pseudo potential double numerical polarization basis set (DNP) were selected for the calculation.<sup>S16</sup> The convergence criterion of self consistent field was  $1 \times 10^{-5}$  Ha. The convergence criterion of SCF was  $1 \times 10^{-6}$  Ha. The convergence criterion of DFT calculation was 0.004 ha/Å. After the simulation, the analysis module of MS was used to analyze the results

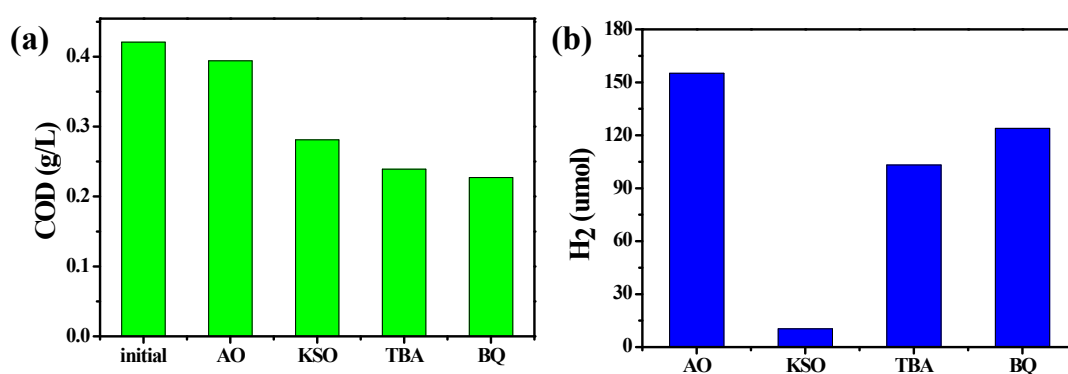

**Fig. S12.** Photocatalytic degradation of (a) real wastewater and (b) H<sub>2</sub> production over FeTMT with or without a scavenger. Ammonium oxalate (AO), Potassium persulfate (KSO), p-benzoquinone (BQ) and tert-butanol (TBA) as scavengers for hole (h<sup>+</sup>),

electron ( $e^-$ ), superoxide radical ( $O_2^{\cdot-}$ ) and hydroxyl radical ( $\cdot OH$ ) trapping, respectively.

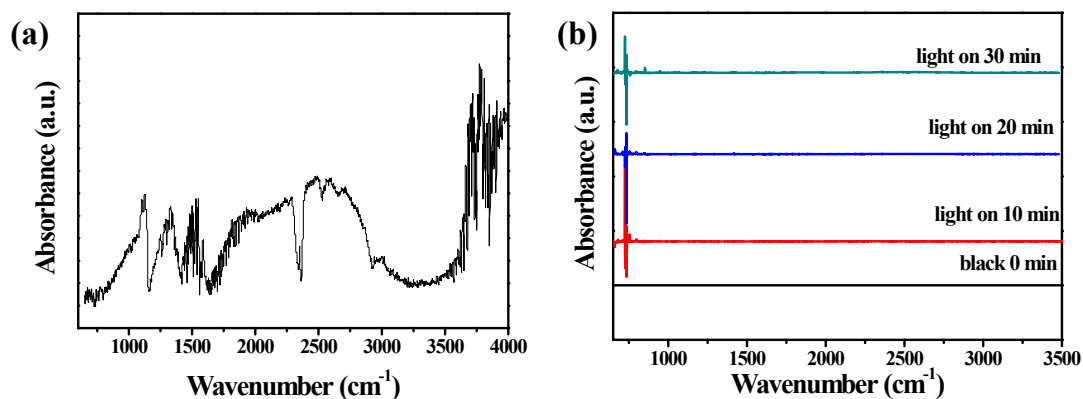

**Fig. S13.** *In situ* infrared spectroscopic experiments of (a) before and (b) after illumination over FeTMT.

The *in situ* FT-IR measurements were tested by a Shimadzu IR Affinity-1 spectrometer equipped with a customized chamber. Typically, the chamber was filled with liquid nitrogen, and the FTMT get wet with waste water. Prior to light irradiation, the reaction system was filled with nitrogen. The *in situ* infrared spectral data were recorded by IR software at certain intervals.

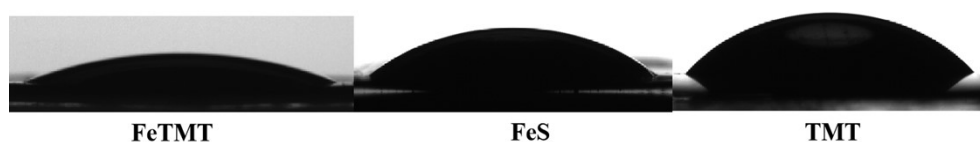

**Fig. S14.** Real wastewater contact angle of the FeTMT ( $26.2^\circ$ ), FeS ( $36.0^\circ$ ), TMT ( $42.6^\circ$ ).

## References

- [S1] H. Belhadj, S. Hamid, P. K. J. Robertson and D. W. Bahnemann, *ACS Catal.*, 2017, **7**, 4753–4758.
- [S2] S. Kampour and K. C. Stylianou, *ACS Catal.*, 2019, **9**, 4247.
- [S3] X.-H. Jiang and L.-C. Wang, F. Yu, Y.-C. Nie, Q.-J. Xing, X. Liu, Y. Pei, J.-P. Zou and W.-L. Dai, *ACS Sustain. Chem. Eng.*, 2018, **6**, 1269.
- [S4] H. Shen, M. Wang, X. Zhang, D. Li, G. Liu and W. Shi, *Fuel*, 2020, **280**, 118618.
- [S5] X. Li, B. Kang, F. Dong, Z. Zhang, X. Luo, L. Han, J. Huang, Z. Feng, Z. Chen, J. Xu, B. Peng and Z. L. Wang, *Nano Energy*, 2021, **81**, 105671.
- [S6] Y.-C. Nie, F. Yu, L.-C. Wang, Q.-J. Xing, X. Liu, Y. Pei, J.-P. Zou, W.-L. Dai, Y. Li and S.-L. Suib, *Appl. Catal. B Environ.*, 2018, **227**, 312.
- [S7] K. Li, Z. Zeng, L. Yan, M. Huo, Y. Guo, S. Lu and X. Luo, *Appl. Catal. B Environ.*, 2016, **187**, 269.
- [S8] K. Li, Z. Zeng, L. Yan, S. Luo, X. Luo, M. Huo and Y. Guo, *Appl. Catal. B Environ.*, 2015, **165**, 428.
- [S9] X. Zhang, J. Deng, J. Yan, Y. Song, Z. Mo, J. Qian, X. Wu, S. Yuan, H. Li and H. Xu, *Appl. Surf. Sci.*, 2019, **490**, 117.
- [S10] D. Li, J. C.-C. Yu, V.-H. Nguyen, J. C. S. Wu and X. Wang, *Appl. Catal. B Environ.*, 2018, **239**, 268.
- [S11] X. Yao, X. Hu, Y. Liu, X. Wang, X. Hong, X. Chen, S. C. Pillai, D. D. Dionysiou and D. Wang, *Chemosphere*, 2020, **261**, 127759.

- [S12] J. Wang, D. Wang, X. Zhang, C. Zhao, M. Zhang, Z. Zhang, J. Wang, *Int. J. Hydrog. Energy*, 2019, **44**, 6592.
- [S13] Z. Chen, S. Li, Y. Peng and C. Hu, *Catal. Sci. Technol.*, 2020, **10**, 5470.
- [S14] D. Wang, J. Liu, M. Zhang, Y. Song, Z. Zhang and J. Wang, *Appl. Surf. Sci.*, 2019, **498**, 143843.
- [S15] S. Li, M. Zhang, Z. Qu, X. Cui, Z. Liu, C. Piao, S. Li, J. Wang and Y. Song, *Chem. Eng. J.*, 2020, **382**, 122394.
- [S16] S. Grimme, J. Antony, S. Ehrlich, H. Krieg, *J. Chem. Phys.*, 2010, **132**, 154104.
